# Circulating Adiponectin and Resistin Levels in Relation to Metabolic Factors, Inflammatory Markers, and Vascular Reactivity in Diabetic Patients and Subjects at Risk for Diabetes

GREESHMA K. SHETTY, MD<sup>1</sup>  
PANAYIOTIS A. ECONOMIDES, MD<sup>1,2,3</sup>  
EDWARD S. HORTON, MD<sup>1,3</sup>

CHRISTOS S. MANTZOROS, MD<sup>1</sup>  
ARISTIDIS VEVES, MD<sup>1,2</sup>

**OBJECTIVE** — Adiponectin and resistin, two recently discovered adipocyte-secreted hormones, may link obesity with insulin resistance and/or metabolic and cardiovascular risk factors. We performed a cross-sectional study to investigate the association of adiponectin and resistin with inflammatory markers, hyperlipidemia, and vascular reactivity and an interventional study to investigate whether atorvastatin mediates its beneficial effects by altering adiponectin or resistin levels.

**RESEARCH DESIGN AND METHODS** — Associations among vascular reactivity, inflammatory markers, resistin, and adiponectin were assessed cross-sectionally using fasting blood samples obtained from 77 subjects who had diabetes or were at high risk to develop diabetes. The effect of atorvastatin on adiponectin and resistin levels was investigated in a 12-week-long randomized, double-blind, placebo-controlled study.

**RESULTS** — In the cross-sectional study, we confirm prior positive correlations of adiponectin with HDL and negative correlations with BMI, triglycerides, C-reactive protein (CRP), and plasma activator inhibitor (PAI)-1 and report a negative correlation with tissue plasminogen activator. The positive association with HDL and the negative association with PAI-1 remained significant after adjusting for sex and BMI. We also confirm prior findings of a negative correlation of resistin with HDL and report for the first time a positive correlation with CRP. All of these associations remained significant after adjusting for sex and BMI. No associations of adiponectin or resistin with any aspects of vascular reactivity were detected. In the interventional study, atorvastatin decreased lipid and CRP levels, but adiponectin and resistin were not specifically altered.

**CONCLUSIONS** — We conclude that adiponectin is significantly associated with inflammatory markers, in part, through an underlying association with obesity, whereas resistin's associations with inflammatory markers appear to be independent of BMI. Lipid profile and inflammatory marker changes produced by atorvastatin cannot be attributed to changes of either adiponectin or resistin.

*Diabetes Care* 27:2450–2457, 2004

From the <sup>1</sup>Division of Endocrinology, Diabetes and Metabolism, Department of Medicine, Beth Israel Deaconess Medical Center, Harvard Medical School, Boston, Massachusetts; the <sup>2</sup>Microcirculation Laboratory, Beth Israel Deaconess Medical Center West Campus, Harvard Medical School, Boston, Massachusetts; and the <sup>3</sup>Joslin Diabetes Center, Harvard Medical School, Boston, Massachusetts.

Address correspondence and reprint requests to Christos S. Mantzoros, MD, Division of Endocrinology, Diabetes and Metabolism, Department of Internal Medicine, Beth Israel Deaconess Medical Center, Harvard Medical School, 99 Brookline Ave., RN 325A, Boston, MA 02215. E-mail: cmantzor@bidmc.harvard.edu.

Received for publication 28 January 2004 and accepted in revised form 9 July 2004.

**Abbreviations:** ACh%, acetylcholine chloride with percentage increase over baseline of endothelium-dependent vasodilation; CRP, C-reactive protein; ET1, endothelin-1; ICAM, intracellular adhesion molecule; NID, nitroglycerin-induced dilation; NNP%, sodium nitroprusside with percentage increase over baseline of endothelium-independent vasodilation; PAI, plasma activator inhibitor; TNF- $\alpha$ , tumor necrosis factor- $\alpha$ ; tPA, tissue plasminogen activator.

A table elsewhere in this issue shows conventional and Système International (SI) units and conversion factors for many substances.

© 2004 by the American Diabetes Association.

Obesity and insulin resistance are associated with cardiovascular risk factors, including altered levels of inflammatory markers and endothelial dysfunction (1). Two recently identified adipocyte-secreted hormones, adiponectin and resistin, are thought to link obesity with insulin resistance and cardiovascular risk (1–7). Adiponectin, a recently discovered 244-amino acid, adipose-specific protein (2), is found in high concentrations in the peripheral circulation (3), and its circulating levels are decreased in obesity and type 2 diabetes (4). Adiponectin levels are inversely associated with central or overall adiposity, as well as hyperlipidemia and insulin resistance independently of BMI (5,6). Resistin levels have been reported to be markedly elevated in obese mice and to be decreased by insulin sensitizers, such as rosiglitazone and other thiazolidinediones, and by the administration of antiresistin antiserum, which also leads to a significant decrease in blood glucose (7). These initial findings in mice were challenged by subsequent observations, however, demonstrating increased or decreased resistin levels in obesity as well as variable responses to thiazolidinediones (8,9) and a null association between circulating resistin and insulin resistance in humans (10,11). Interestingly, although resistin has structural similarities to proteins involved in inflammatory processes (12), circulating resistin levels have never been studied in relation to inflammatory markers in humans. In contrast, adiponectin has been associated with markers of inflammation, such as C-reactive protein (CRP) and tumor necrosis factor- $\alpha$  (TNF- $\alpha$ ) (13,14), but associations with several other inflammatory markers remain to be studied.

Thus, we have studied cross-sectionally whether adiponectin is inversely associated and if resistin is

positively associated with inflammatory markers, hyperlipidemia, and vascular reactivity. We also studied, in the context of a 12-week-long, double-blind, randomized, placebo-controlled clinical trial, whether atorvastatin, a 3-hydroxy-3-methylglutaryl coenzyme A reductase inhibitor, which reduces total cholesterol, LDL (15), and triglycerides (16), increases HDL levels (17), and may mediate improved insulin sensitivity (18), affects these outcomes by altering adiponectin and/or resistin levels.

## RESEARCH DESIGN AND METHODS

The present study included 77 previously studied subjects (19) who had diabetes with no serious long-term complications (defined as macroalbuminuria, severe neuropathy, and/or peripheral vascular disease associated with foot ulceration or other lower-extremity amputations) or were considered at higher risk to develop type 2 diabetes than the general population (a positive family history and a normal 75-g oral glucose tolerance test, subjects with at least one first-degree relative with type 2 diabetes, or subjects with impaired glucose tolerance), using previously described criteria (20). The study protocol was approved by the institutional review boards at the Joslin Diabetes Center and the Beth Israel Deaconess Medical Center. After being informed on the purpose and procedures of the study, all subjects signed an informed consent form. Subjects were evaluated at an initial screening visit, which involved a full medical history and physical examination including blood pressure, weight, height, waist-to-hip ratio, funduscopy, and evaluation for clinical signs of neuropathy. Subjects were excluded if they had a known history of cardiovascular disease, stroke or transient ischemic attack, uncontrolled hypertension, liver disease, renal disease, severe dyslipidemia (triglycerides >600 mg/dl or cholesterol >350 mg/dl), or any other serious chronic disease requiring active treatment. Women of child-bearing potential not using an effective form of nonhormonal birth control and subjects taking lipid-lowering agents during the last 3 months, glucocorticoids, antineoplastic agents, psychoactive agents, or bronchodilators on a regular basis were also excluded.

## Cross-sectional study

Blood samples were obtained after an overnight fast (~10 h) and a 24-h period free of alcohol or vigorous exercise. Subjects were asked not to take their diabetes medications (sulfonylureas or metformin) for 12 h before each visit. Those subjects using insulin were requested to hold the rapid-acting insulin the morning of each visit. Blood samples were drawn from an antecubital vein with a 19-gauge needle without venous stasis, and the sera were stored at  $-70^{\circ}\text{C}$ .

## Interventional study

The effect of atorvastatin on adiponectin and resistin levels was investigated in a randomized, double-blind, placebo-controlled study. The 77 subjects described above in the cross-sectional study were randomized in a double-blind manner to receive either 20 mg of atorvastatin daily or the matching placebo for 12 weeks. The subjects were asked to continue with their prior medications, diet plan, and physical activity level in a constant manner for the duration of the study. Subjects were evaluated at baseline and reevaluated after a 12-week treatment period at an exit visit with repeat laboratory evaluations. Vascular reactivity testing was also done at baseline and repeated at 12 weeks. To evaluate the association of serum adiponectin levels, serum resistin levels, and markers of vascular inflammation, fasting blood samples were obtained at baseline and at 12 weeks.

## Hormone measurements

Blood samples were analyzed for HDL cholesterol, LDL cholesterol, total cholesterol, triglycerides, endothelin-1 (ET1), CRP, tumor necrosis factor- $\alpha$  (TNF- $\alpha$ ), intracellular adhesion molecule (ICAM), plasma activator inhibitor (PAI)-1, tissue plasminogen activator (tPA), adiponectin, and resistin. Plasma total cholesterol, HDL cholesterol, and triglycerides were measured using the Synchron CX analyzer (Beckman/Coulter) as previously described (21). LDL cholesterol was calculated from these results. Hormone concentrations were measured using commercially available methods (10) as follows: adiponectin radioimmunoassay (Linco Research, St. Charles, MO) (sensitivity 2  $\mu\text{g/ml}$ ; intra-assay coefficient of variation [CV] 1.78–6.21%), human resistin (BioVendor, Brno, Czech Republic) (0.2 ng/ml; 3.4–5.2%), soluble ICAM (R

& D Systems, Minneapolis, MN) (0.35 ng/ml; 3.3–4.8%), and ET1 (R & D Systems) (1.0 pg/ml; 4.2–4.6%) were measured in plasma by the enzyme-linked immunosorbent assay method. TNF- $\alpha$  (Immulite DPC) (8.1 pg/ml; 2.6–3.6%) and CRP (Immulite DPC) (0.01 mg/dl; 4.2–6.4%) were measured by chemiluminescent immunoassay. PAI-1 (Diagnostica Stago, France) (1.0 ng/ml; 5.48–6.53%) and tPA (Diagnostica Stago) (1.0 ng/ml; 4.49–4.54%) were also measured by the enzyme-linked immunosorbent assay method. To minimize variability, hormone levels were measured in one assay for all subjects participating in the cross-sectional study and in one assay for each subject in the interventional studies.

## Vascular reactivity tests

The vascular reactivity of the forearm skin microcirculation was evaluated by laser Doppler perfusion imaging measurements before and after iontophoresis of acetylcholine chloride ([ACH%], percent increase over baseline of endothelium-dependent vasodilation) and sodium nitroprusside ([NNP%], percent increase over baseline of endothelium-independent vasodilation) and as previously described (22). To assess the endothelium-dependent reactivity in the macrocirculation, the flow-mediated brachial artery dilation was measured by using a high-resolution ultrasound with a 10.0-MHz linear array transducer and an HDI Ultramark 9 system (Advanced Technology Laboratories, Bothel, WA). Reactive hyperemia was produced by inflating a pneumatic tourniquet to 50 mmHg above the systolic pressure for 5 min distal to the brachial artery, and the flow at rest and reactive flow were measured. All measurements were in accordance with recently published guidelines (23). Endothelium-independent vasodilation in the macrocirculation (nitroglycerin-induced dilation [NID]) was assessed by studying brachial artery diameter changes 5 min after the administration of 400  $\mu\text{g}$  of sublingual nitroglycerine (19). This test was performed 15 min after the reactive hyperemia test and after obtaining a new baseline reading.

## Data analysis

Data were summarized using standard procedures. Any missing values due to insufficient sample or values outside the assay range were excluded from the analysis

Table 1—Baseline characteristics of the subjects

|                                                       | At risk of type 2 diabetes | Diabetic patients |
|-------------------------------------------------------|----------------------------|-------------------|
| Total patients                                        | 37                         | 40                |
| Age (years)                                           | 49 ± 12                    | 53 ± 13           |
| Men                                                   | 20 (54)                    | 23 (58)           |
| With first-degree relative (normal glucose tolerance) | 25 (68)                    | —                 |
| With impaired glucose tolerance                       | 12 (32)                    | —                 |
| Type 1/type 2 diabetes                                | —                          | 20/20             |
| Diabetes duration (years)                             | —                          | 8 ± 12            |
| BMI (kg/m <sup>2</sup> )                              | 29.5 ± 5.8                 | 29.8 ± 9.4        |
| Fasting glucose (mg/dl)                               | 90 ± 11                    | 178 ± 79          |
| HbA <sub>1c</sub> (%)                                 | 5.4 ± 0.4                  | 8.0 ± 1.6         |
| Total cholesterol (mg/dl)                             | 206 ± 40                   | 205 ± 42          |
| LDL (mg/dl)                                           | 125 ± 31                   | 124 ± 35          |
| HDL (mg/dl)                                           | 59 ± 19                    | 60 ± 14           |
| Triglycerides (mg/dl)                                 | 118 ± 78                   | 102 ± 75          |
| Diabetes treatment                                    |                            |                   |
| Diet                                                  | —                          | 1 (3)             |
| Oral agents                                           | —                          | 15 (37)           |
| Insulin                                               | —                          | 24 (60)           |
| Resting brachial artery diameter (mm)                 | 3.4 ± 0.7                  | 3.6 ± 0.7         |
| FMD                                                   | 5.8 (4.0–9.3)              | 5.0 (3.2–7.8)     |
| NID                                                   | 15.2 (11.4–20.9)           | 13.4 (10.1–17.1)  |
| ACH%                                                  | 158 ± 77                   | 149 ± 77          |
| NNP%                                                  | 88 ± 49                    | 93 ± 44           |

Data are mean ± SD, *n* (%), or median (25–75 percentiles). FMD, flow-mediated dilation percentage increase over baseline (endothelium-dependent reactivity of macrocirculation).

of this specific variable only. In the cross-sectional study, we performed both Spearman's and Pearson's correlation analysis, and we report herein the Spearman's correlation coefficients that are more conservative. Then we performed bivariate and multivariate regression analyses. We evaluated for potential associations among serum adiponectin levels and serum resistin levels (dependent variables) and BMI, metabolic markers (lipid profile), inflammatory parameters (ICAM, ET1, TNF- $\alpha$ , CRP, PAI-1, tPA), as well as vascular reactivity, all expressed as continuous variables. In the multivariate analysis models, we evaluated the same independent variables after controlling for potential confounding by sex, sex and BMI, and sex, BMI, and HbA<sub>1c</sub>. Logarithmic transformation was used to normalize nonnormally distributed dependent variables.

In the interventional study, we assessed the differences in adiponectin and resistin levels, lipid levels and inflammatory marker levels, as well as BMI using a paired *t* test for parametrically distributed data and the Wilcoxon matched-pair

signed-rank test for nonparametrically distributed data to compare baseline data and data at the end of the study. The *t* test was used to compare the baseline characteristics between those receiving active treatments and those receiving placebo.

SPSS 8.0 software (SPSS, Chicago, IL) was used for statistical analysis. A *P* value <0.025 (two tailed) was considered statistically significant for all analyses (Bonferroni correction). Descriptive statistics are presented as mean ± SE.

## RESULTS

### Cross-sectional study

Baseline characteristics of the study population are presented in Table 1. Spearman correlations, including all subjects, among adiponectin and the metabolic markers, inflammatory markers, and vascular reactivity, confirmed prior findings of the positive correlation with HDL ( $r = 0.42$ ,  $P < 0.01$ ) and the negative correlations with triglycerides ( $r = -0.35$ ,  $P < 0.01$ ), CRP ( $r = -0.21$ ,  $P = 0.026$ ), PAI-1 ( $r = -0.39$ ,  $P < 0.01$ ), and BMI ( $r = -0.32$ ,  $P < 0.01$ ). Additionally, we

discovered the negative correlation of adiponectin with tPA ( $r = -0.30$ ,  $P < 0.01$ ) (Table 2). We found no correlation of adiponectin with vascular reactivity or glucose levels. Spearman correlations, including all subjects, among resistin and the metabolic markers, inflammatory markers, and vascular reactivity, confirmed prior findings of a negative correlation with HDL ( $r = -0.23$ ,  $P < 0.01$ ) and positive correlation with CRP ( $r = 0.25$ ,  $P < 0.01$ ) (Table 2). Resistin was not associated with any other study variable, including glucose.

We then performed bivariate regression analyses of adiponectin and of resistin with metabolic factors, inflammatory markers, and vascular reactivity considered as independent variables (Tables 3 and 4). We found a positive correlation of adiponectin with HDL and a negative correlation of adiponectin with triglycerides, CRP, PAI-1, and tPA (Table 3). In addition, there was no association among adiponectin and total cholesterol, LDL, ICAM, ET1, TNF- $\alpha$ , and the vascular reactivity measurements (flow at rest, flow-mediated brachial artery dilation, NID, ACH%, and NNP%). To adjust for potential confounders, we then performed multivariate regression analyses, adjusting for successively introduced covariates: sex, then sex and BMI, and finally sex, BMI, and HbA<sub>1c</sub>. With adjustment for sex, all of the positive and negative correlations found with the bivariate analyses remained significant. However, after adjusting for both sex and BMI, only the positive association with HDL and the negative association for PAI-1 remained significant (Table 3), indicating that adiponectin may mediate the effect of obesity on triglycerides, CRP, and tPA. Finally, we found a positive correlation of resistin with CRP and a negative correlation with HDL (Table 4), and these associations remained significant after adjusting for sex, BMI, and HbA<sub>1c</sub>, indicating that the effect of resistin is independent of obesity and glycemic control. We also ran these correlations of adiponectin and resistin with metabolic markers, inflammatory markers, and vascular reactivity, excluding the type 1 diabetic subjects. We found a similar positive correlation of adiponectin with HDL ( $r = 0.40$ ,  $P < 0.01$ ), a negative correlation with PAI-1 ( $r = -0.33$ ,  $P < 0.01$ ), and a negative correlation with BMI ( $r = -0.25$ ,  $P < 0.025$ ). However, the other significant correlations found in the

Table 2—Spearman correlation coefficients among adiponectin, resistin, metabolic and inflammatory markers, and vascular reactivity in subjects at risk of diabetes and in subjects with type 1 and type 2 diabetes

|                   | Adiponectin | Resistin | Total cholesterol | HDL    | LDL   | Triglycerides | ICAM  | ET1   | TNF- $\alpha$ | CRP    | PAI-1 | tPA    | BMI   | FR     | FMD   | NID   | ACH%  |
|-------------------|-------------|----------|-------------------|--------|-------|---------------|-------|-------|---------------|--------|-------|--------|-------|--------|-------|-------|-------|
| Adiponectin       |             |          |                   |        |       |               |       |       |               |        |       |        |       |        |       |       |       |
| Resistin          | -0.004      |          |                   |        |       |               |       |       |               |        |       |        |       |        |       |       |       |
| Total cholesterol | -0.001      | -0.01    |                   |        |       |               |       |       |               |        |       |        |       |        |       |       |       |
| HDL               | 0.42*       | -0.23*   | 0.33*             |        |       |               |       |       |               |        |       |        |       |        |       |       |       |
| LDL               | -0.06       | 0.11     | 0.92*             | 0.12   |       |               |       |       |               |        |       |        |       |        |       |       |       |
| Triglycerides     | -0.35*      | 0.02     | 0.25*             | -0.43* | 0.18  |               |       |       |               |        |       |        |       |        |       |       |       |
| ICAM              | 0.13        | 0.06     | -0.18             | -0.22  | -0.15 | 0.07          |       |       |               |        |       |        |       |        |       |       |       |
| ET1               | 0.17        | 0.12     | -0.03             | -0.09  | -0.03 | -0.02         | 0.37* |       |               |        |       |        |       |        |       |       |       |
| TNF- $\alpha$     | -0.07       | 0.02     | -0.03             | -0.03  | -0.06 | 0.17          | 0.001 | 0.07  |               |        |       |        |       |        |       |       |       |
| CRP               | -0.21†      | 0.25*    | 0.04              | -0.19  | 0.07  | 0.16          | 0.14  | 0.35* | 0.26*         |        |       |        |       |        |       |       |       |
| PAI-1             | -0.39*      | 0.08     | 0.07              | -0.41* | 0.06  | 0.52*         | 0.14  | 0.15  | 0.29*         | 0.28*  |       |        |       |        |       |       |       |
| tPA               | -0.30*      | 0.07     | 0.03              | -0.40* | 0.002 | 0.51*         | 0.13  | 0.21  | 0.27*         | 0.36*  | 0.72* |        |       |        |       |       |       |
| BMI               | -0.32*      | 0.13     | -0.07             | -0.40* | -0.01 | 0.32*         | 0.24† | 0.25  | 0.26*         | 0.60*  | 0.48* | 0.48*  |       |        |       |       |       |
| FR                | -0.12       | 0.15     | -0.11             | -0.35* | -0.03 | 0.16          | 0.21  | 0.41* | 0.15          | 0.29*  | 0.21† | 0.27*  | 0.21† |        |       |       |       |
| FMD               | -0.01       | -0.14    | 0.01              | 0.19   | -0.05 | -0.06         | -0.11 | -0.16 | -0.04         | -0.23† | -0.19 | -0.34* | -0.13 | -0.55* |       |       |       |
| NID               | -0.05       | -0.25†   | 0.07              | 0.13   | -0.04 | 0.15          | -0.24 | -0.06 | -0.14         | -0.27* | 0.001 | -0.05  | 0.06  | -0.50* | 0.57* |       |       |
| ACH%              | -0.05       | -0.03    | 0.11              | 0.13   | 0.11  | -0.09         | -0.19 | 0.02  | 0.04          | 0.04   | -0.02 | -0.03  | -0.01 | -0.13  | -0.11 | -0.01 |       |
| NNP%              | 0.10        | 0.06     | -0.04             | 0.11   | -0.04 | -0.06         | -0.13 | 0.10  | -0.05         | 0.04   | -0.03 | -0.12  | 0.10  | -0.12  | -0.05 | -0.05 | 0.52* |

FMD, flow-mediated dilation percent increase over baseline (endothelium-dependent reactivity of macrocirculation); FR, resting brachial artery diameter (mm). \* $P < 0.01$ ; † $P = 0.026$ ; ‡ $P < 0.025$ .

entire group did not remain significant (triglycerides [ $r = -0.11$ ] and CRP [ $r = -0.17$ ]), which was probably due to the smaller  $n$ . None of the previously significant correlations of HDL, CRP, and NID with resistin remained significant when we ran these correlations excluding the type 1 diabetic subjects from the entire group.

Finally, we ran all correlations in the entire study sample after statistically controlling for type 1 versus type 2 diabetes status. The previously nonsignificant associations remained unchanged. The significant associations were as follows after controlling for diabetes status: 1) adiponectin versus HDL ( $r = 0.27$ ,  $P < 0.01$ ), versus triglycerides ( $r = -0.07$ ,  $P = 0.45$ ), versus tPA ( $r = -0.09$ ,  $P = 0.32$ ), versus BMI ( $r = -0.18$ ,  $P = 0.04$ ), and versus PAI-1 ( $r = -0.022$ ,  $P < 0.026$ ) and 2) resistin versus HDL ( $r = -0.27$ ,  $P < 0.01$ ), versus CRP ( $r = 0.23$ ,  $P < 0.026$ ), and versus NID ( $r = -0.20$ ,  $P = 0.05$ ), which remained essentially unchanged.

### Interventional study

Both atorvastatin and placebo treatment resulted in a decrease in total cholesterol and LDL levels, but the decrease in the atorvastatin group was much greater (Table 5). CRP levels also decreased significantly in the atorvastatin group but did not change significantly in the placebo group. Serum adiponectin levels did not change significantly in either the placebo or active treatment group, and serum resistin levels decreased significantly but to the same extent in both groups (Table 5), indicating that atorvastatin has no specific effect on these two hormones. Similar results were obtained when diabetic and nondiabetic subjects were considered separately.

**CONCLUSIONS**— Accumulating evidence from animal and human studies shows that adiponectin plays an important role in insulin sensitivity (24–28), inflammation (29), atherogenesis (30,31), lipid metabolism (6,24), and thus influences hyperlipidemia and CAD (29). The association between adiponectin and insulin sensitivity has been established in animal models in which adiponectin administration reversed insulin resistance in lipoatrophic mice (25). Adiponectin levels are significantly lower in humans with type 2 diabetes or insulin



**Table 3—Bivariate and multivariate regression analyses of serum adiponectin levels on metabolic factors, inflammatory markers, and vascular reactivity\***

| Parameters                | $\beta 1$ | $\beta 2$ | $\beta 3$ | $\beta 4$ |
|---------------------------|-----------|-----------|-----------|-----------|
| Metabolic factors         |           |           |           |           |
| Total cholesterol (mg/dl) | 0.03      | 0.02      | −0.05     | −0.05     |
| LDL cholesterol (mg/dl)   | −0.04     | −0.04     | −0.09     | −0.08     |
| HDL cholesterol (mg/dl)   | 0.37†     | 0.40†     | 0.31‡     | 0.31†     |
| Triglycerides (mg/dl)     | −0.22‡    | −0.22‡    | −0.17     | −0.17     |
| Inflammatory markers      |           |           |           |           |
| ICAM (ng/ml)              | 0.17      | 0.19      | 0.21      | 0.19      |
| ET1 (pg/ml)               | 0.15      | 0.15      | 0.24      | 0.21      |
| TNF- $\alpha$ (pg/ml)     | −0.13     | −0.14     | −0.06     | −0.05     |
| CRP (mg/dl)*              | −0.22‡    | −0.25†    | −0.07     | −0.20     |
| PAI-1 (ng/ml)             | −0.36†    | −0.36†    | −0.24‡    | −0.21     |
| tPA (ng/ml)               | −0.26†    | −0.26†    | −0.15     | −0.15     |
| Vascular reactivity       |           |           |           |           |
| FR                        | −0.11     | −0.14     | −0.002    | −0.02     |
| FMD                       | 0.004     | −0.003    | −0.02     | 0.004     |
| NID                       | −0.03     | −0.05     | −0.04     | 0.01      |
| ACH%                      | −0.09     | −0.12     | −0.12     | −0.10     |
| NNP%                      | 0.01      | 0.003     | 0.04      | 0.05      |

$\beta 1$ , bivariate standardized linear regression coefficient;  $\beta 2$ , multivariate standardized linear regression coefficient adjusted for sex;  $\beta 3$ , multivariate standardized linear regression coefficient adjusted for sex and BMI;  $\beta 4$ , multivariate standardized linear regression coefficient adjusted for sex, BMI, and HbA<sub>1c</sub>. FMD, flow-mediated dilation percentage increase over baseline (endothelium-dependent reactivity of macrocirculation); FR, resting brachial artery diameter (in millimeters). \*Logarithmic transformation performed before analysis. † $P < 0.01$ ; ‡ $P < 0.025$ .

resistance (32) and increase in subjects treated with thiazolidinediones (33,34), suggesting that adiponectin plays a role in the thiazolidinedione effect of improving insulin sensitivity and decreasing inflammation. In addition, adiponectin may play a critical role in suppressing the inflammatory response that is associated with atherogenesis, endothelial dysfunction, and ultimately vascular disease (29). In vitro mechanistic studies in human aortic endothelial cells have shown that human recombinant adiponectin in a dose-dependent manner suppresses endothelial expression of adhesion molecules, proliferation of vascular smooth muscle cells, and the transformation of macrophages to foam cells (30). Adiponectin also significantly inhibits macrophage phagocytic activity and suppresses lipopolysaccharide-induced production of TNF- $\alpha$  (29). Animal studies in apolipoprotein E-deficient mice demonstrated that adiponectin suppressed the expression of adhesion molecules, scavenger receptors, and TNF- $\alpha$  levels, which cumulatively resulted in reduced in vivo atherosclerosis (35). Finally, it has recently been reported that circulating adiponectin correlates in-

versely with serum levels of certain inflammatory markers, such as CRP (13). We searched for novel associations between circulating adiponectin and tPA, in addition to confirming known associations with HDL, triglycerides, and PAI-1. Adiponectin's association with HDL and PAI-1 was independent of BMI, which suggests adiponectin may mediate some effects of adiposity, but whether central obesity or other unrecognized pathways might play a regulatory role remains to be elucidated by future studies.

We found that in subjects with diabetes or at risk of developing diabetes, adiponectin is negatively correlated with BMI, triglycerides, CRP, PAI-1, and tPA, suggesting that adiponectin may act as an anti-inflammatory mediator with respect to CRP, PAI-1, and tPA. These findings are consistent with prior data that adiponectin levels correlate negatively with inflammation and endothelial dysfunction (12). In addition to adiponectin's negative association with CRP (13), a molecule known to promote atherogenesis via monocytes and endothelial cells (36), we provide the first description of a negative association between adiponectin and tPA, a molecule known to play a role

**Table 4—Bivariate and multivariate regression analyses of serum resistin levels on metabolic factors, inflammatory markers, and vascular reactivity\***

| Parameters                | $\beta 1$ | $\beta 2$ | $\beta 3$ | $\beta 4$ |
|---------------------------|-----------|-----------|-----------|-----------|
| Metabolic factors         |           |           |           |           |
| Total cholesterol (mg/dl) | −0.004    | −0.01     | 0.02      | 0.02      |
| LDL cholesterol (mg/dl)   | 0.11      | 0.11      | 0.13      | 0.13      |
| HDL cholesterol (mg/dl)   | −0.28†    | −0.33†    | −0.33‡    | −0.33†    |
| Triglycerides (mg/dl)     | 0.03      | 0.04      | 0.01      | 0.01      |
| Inflammatory markers      |           |           |           |           |
| ICAM (ng/ml)              | −0.02     | −0.01     | −0.06     | −0.05     |
| ET1 (pg/ml)               | 0.22      | 0.22      | 0.23      | 0.25      |
| TNF- $\alpha$ (pg/ml)     | 0.01      | 0.01      | −0.02     | −0.01     |
| CRP (mg/dl)*              | 0.28†     | 0.29†     | 0.38†     | 0.39†     |
| PAI-1 (ng/ml)             | 0.12      | 0.13      | 0.10      | 0.13      |
| tPA (ng/ml)               | 0.08      | 0.08      | 0.03      | 0.03      |
| Vascular reactivity       |           |           |           |           |
| FR                        | 0.17      | 0.22      | 0.18      | 0.17      |
| FMD                       | −0.13     | −0.13     | −0.12     | −0.12     |
| NID                       | −0.17     | −0.17     | −0.18     | −0.17     |
| ACH%                      | 0.06      | 0.07      | 0.07      | 0.08      |
| NNP%                      | 0.07      | 0.06      | 0.05      | 0.05      |

$\beta 1$ , bivariate standardized linear regression coefficient;  $\beta 2$ , multivariate standardized linear regression coefficient adjusted for sex;  $\beta 3$ , multivariate standardized linear regression coefficient adjusted for sex and BMI;  $\beta 4$ , multivariate standardized linear regression coefficient adjusted for sex, BMI, and HbA<sub>1c</sub>. FMD, flow-mediated dilation percentage increase over baseline (endothelium-dependent reactivity of macrocirculation); FR, resting brachial artery diameter (in millimeters). \*Logarithmic transformation performed before analysis; † $P < 0.01$ ; ‡ $P < 0.025$ .

Table 5—Results of changes in response to atorvastatin or placebo

|                           | Atorvastatin     |                 | Placebo†         |                 |
|---------------------------|------------------|-----------------|------------------|-----------------|
|                           | Before treatment | After treatment | Before treatment | After treatment |
| Adiponectin (μg/ml)       | 21.7 ± 2.3       | 21.4 ± 2.2      | 25.2 ± 3.5       | 28.2 ± 4.1      |
| Resistin (ng/ml)          | 8.1 ± 0.8        | 6.8 ± 0.6*      | 8.1 ± 0.8        | 6.7 ± 0.6‡      |
| BMI (kg/m <sup>2</sup> )  | 29.5 ± 1.3       | 29.3 ± 1.2      | 28.8 ± 1.1       | 28.9 ± 1.0      |
| Total cholesterol (mg/dl) | 199.8 ± 7.0      | 150.7 ± 5.8†    | 211.9 ± 7.0      | 199.5 ± 5.3†    |
| HDL (mg/dl)               | 58.8 ± 2.3       | 56.9 ± 2.3      | 61.9 ± 3.3       | 59.3 ± 2.9      |
| LDL (mg/dl)               | 120.4 ± 5.9      | 76.7 ± 4.9†     | 127.0 ± 5.6      | 118.4 ± 4.6†    |
| Triglycerides (mg/dl)     | 114.3 ± 15.0     | 99.3 ± 14.5     | 110.2 ± 13.0     | 116.2 ± 12.9    |
| ICAM (ng/ml)              | 240.3 ± 9.2      | 244.8 ± 8.6     | 219.3 ± 16.9     | 236.6 ± 13.3    |
| ET1 (pg/ml)               | 0.76 ± 0.05      | 0.70 ± 0.04     | 0.66 ± 0.08      | 0.68 ± 0.07     |
| TNF-α (pg/ml)             | 3.5 ± 0.3        | 3.1 ± 0.3       | 2.7 ± 0.4        | 3.3 ± 0.4       |
| CRP (mg/dl)               | 0.32 ± 0.05      | 0.25 ± 0.04*    | 0.30 ± 0.05      | 0.26 ± 0.04     |
| PAI-1 (ng/ml)             | 28.8 ± 4.0       | 22.6 ± 3.3      | 21.1 ± 3.0       | 24.9 ± 4.3      |
| tPA (ng/ml)               | 7.7 ± 0.7        | 7.2 ± 0.7       | 6.6 ± 0.6        | 6.4 ± 0.6       |

Data are mean ± SE. Atorvastatin, *n* = 34; placebo, *n* = 33. \**P* < 0.025; †*P* < 0.01; ‡*P* = 0.03.

in impaired fibrinolysis in humans (37). The negative correlation of adiponectin to PAI-1, which is also associated with insulin resistance and the metabolic syndrome (38,39), provides another possible mechanism for adiponectin in affecting the metabolic syndrome-induced morbidity and mortality. Further analysis of adiponectin adjusting for type of diabetes showed slightly different associations with tPA. These findings need to be confirmed in larger studies.

Resistin, which has recently been proposed to play a role in obesity-mediated insulin resistance (7), has a structure similar to that of proteins that are involved in inflammatory processes (12). More specifically, resistin is identical to FIZZ3 (found in inflammatory zone 3), and resistin-like molecules, such as RELM-α and RELM-β, are identical with FIZZ1 and FIZZ2, respectively. Patterns of expression of FIZZ proteins are very similar to those reported for resistin and RELMs (8,12). In addition, the pattern of expression and physiological functions proposed for these proteins resemble those of other well-known proinflammatory cytokines, such as interleukin-6 and TNF-α, both of which are involved in cardiovascular obesity-related outcomes (40). These findings suggest that resistin/FIZZ3 and RELMs/FIZZ1 and FIZZ2 may be involved in the inflammatory processes associated with obesity (41), but the role of resistin in vascular reactivity or potential associations with inflammatory markers have not been previously studied. In ad-

dition to the known negative correlation between serum resistin and HDL, we report a positive correlation of serum resistin to CRP, and these correlations remained significant after adjusting for type of diabetes, which suggests that the type of diabetes does not influence the associations between resistin levels and these variables. The positive association to CRP also remained significant despite adjustments for sex and BMI, suggesting that resistin's proinflammatory properties may be independent of overall obesity. Larger studies are needed to confirm and extend these findings in healthy and diabetic subjects.

We did not find any correlations between vascular reactivity and adiponectin or resistin in this study. There are two published studies reporting conflicting results regarding adiponectin and vascular function (42,43). More specifically, a recent report showing that hypo-adiponectinemia is associated with impaired endothelium-dependent vasodilation (42) conflicts with our findings of no association between adiponectin and any vascular reactivity. Furthermore, the second recently published report stated that adiponectin is associated with endothelium-independent vasodilation, but not endothelium-dependent vasodilation (43). Based on our findings and the findings from these two other groups, we do not feel there is a well-established and reproducible association between vascular reactivity and either adiponectin or resistin levels.

Another topic we addressed in this study was whether statin treatment alters circulating adiponectin and resistin levels. The current understanding of statin efficacy in decreasing the relative risk of major coronary events by 30% has been attributed to several mechanisms, including beneficial effects on plasma lipoprotein levels, endothelial function, plaque architecture and stability, thrombosis, and inflammation, which are seen in addition to and independent of decreased LDL (44–48). Whereas it is enticing to explain some of the vascular and inflammatory effects mediated by atorvastatin possibly via alterations in adiponectin or resistin levels, data from the interventional part of the study show that atorvastatin does not significantly alter serum adiponectin or resistin levels when compared with placebo. These data indicate that other pathways may mediate atorvastatin's effects on insulin resistance and inflammatory processes.

In summary, the findings of this study indicate that adiponectin may have a wide-ranging role in metabolism and inflammation by being associated not only with lipoprotein levels but also inflammatory markers and that some of these associations reflect an underlying association with obesity, whereas others are independent of obesity. However, resistin's associations with inflammatory markers appear to be independent of BMI, suggesting that resistin may have a direct proinflammatory role or mediate its effects via yet to be discovered obesity-

independent mechanisms. Finally, neither vascular reactivity nor lipid profile changes and inflammatory changes produced by therapy with atorvastatin can be attributed to alterations of either adiponectin or resistin levels. Further studies to confirm and extend these observations as well as to elucidate the underlying mechanisms are clearly needed.

**Acknowledgments**—The present study was an investigator-initiated research protocol and was supported by a clinical research grant to Aristidis Veves, MD, from Pfizer. This research was also supported in part by the National Institutes of Health Grants R01-158785, RR-01032, and F32-DK-64550-01A1 and by a William Randolph Hearst Fellowship and a Mary K. Iacocca Fellowship.

## References

- Weyer C, Yudkin JS, Stehouwer CD, Schalkwijk CG, Pratley RE, Tataranni PA: Humoral markers of inflammation and endothelial dysfunction in relation to adiposity and in vivo insulin action in Pima Indians. *Atherosclerosis* 161:233–242, 2002
- Nakano Y, Tobe T, Choi-Miura NH, Mazda T, Tomita M: Isolation and characterization of GBP28, a novel gelatin-binding protein purified from human plasma. *J Biochem (Tokyo)* 120:803–812, 1996
- Tsao TS, Lodish HF, Fruebis J: ACRP30, a new hormone controlling fat and glucose metabolism. *Eur J Pharmacol* 440:213–221, 2002
- Arita Y, Kihara S, Ouchi N, Takahashi M, Maeda K, Miyagawa J, Hotta K, Shimomura I, Nakamura T, Miyaoka K, Kuriyama H, Nishida M, Yamashita S, Okubo K, Matsubara K, Muraguchi M, Ohmoto Y, Funahashi T, Matsuzawa Y: Paradoxical decrease of an adipose-specific protein, adiponectin, in obesity. *Biochem Biophys Res Commun* 257:79–83, 1999
- Yamamoto Y, Hirose H, Saito I, Tomita M, Taniyama M, Matsubara K, Okazaki Y, Ishii T, Nishikai K, Saruta T: Correlation of the adipocyte-derived protein adiponectin with insulin resistance index and serum high-density lipoprotein-cholesterol, independent of body mass index, in the Japanese population. *Clin Sci (Lond)* 103:137–142, 2002
- Matsubara M, Maruka S, Katayose S: Inverse relationship between plasma adiponectin and leptin concentrations in normal-weight and obese women. *Eur J Endocrinol* 147:173–180, 2002
- Steppan CM, Bailey ST, Bhat S, Brown EJ, Banerjee RR, Wright CM, Patel HR, Ahima RS, Lazar MA: The hormone resistin links obesity to diabetes. *Nature* 409:307–312, 2001
- Steppan CM, Lazar MA: Resistin and obesity-associated insulin resistance. *Trends Endocrinol Metab* 13:18–23, 2002
- Way JM, Gorgun CZ, Tong Q, Uysal KT, Brown KK, Harrington WW, Oliver WR, Willson TM, Klier SA, Hotamisligil GS: Adipose tissue resistin expression is severely suppressed in obesity and stimulated by peroxisome proliferator-activator receptor  $\gamma$ -agonists. *J Biol Chem* 276:25651–25653, 2001
- Lee JH, Chan JL, Yiannakouris N, Kontogianni M, Estrada E, Seip R, Orlova C, Mantzoros C: Circulating resistin levels are not associated with obesity or insulin resistance in humans and are not regulated by fasting or leptin administration: cross-sectional and interventional studies in normal, insulin-resistant and diabetic subjects. *J Clin Endocrinol Metab* 88:4848–4856, 2003
- Silha JV, Krsek M, Hana V, Marek J, Jezkova J, Weiss V, Murphy LJ: Perturbations in adiponectin, leptin and resistin levels in acromegaly: lack of correlation with insulin resistance. *Clin Endocrinol* 58:736–742, 2003
- Holcomb IN, Kabakoff RC, Chan B, Baker TW, Gurney A, Henzel W, Nelson C, Lowman HB, Wright BD, Skelton NJ, Frantz GD, Tumas DB, Peale FV Jr, Shelton DL, Hebert CC: FIZZ1, a novel cysteine-rich secreted protein associated with pulmonary inflammation, defines a new gene family. *EMBO J* 19:4046–4055, 2000
- Ouchi N, Kihara S, Funahashi T, Nakamura T, Nishida M, Kumada M, Okamoto Y, Ohashi K, Nagaretani H, Kishida K, Nishizawa H, Maeda N, Kobayashi H, Hiraoka H, Matsuzawa Y: Reciprocal association of C-reactive protein with adiponectin in blood stream and adipose tissue. *Circulation* 107:671–674, 2003
- Krakoff J, Funahashi T, Stehouwer CD, Schalkwijk CG, Tanaka S, Matsuzawa Y, Kobes S, Tataranni PA, Hanson RL, Knowler WC, Lindsay RS: Inflammatory markers, adiponectin, and risk of type 2 diabetes in the Pima Indian. *Diabetes Care* 26:1745–1751, 2003
- Larsen ML, Illingworth DR: Drug treatment of dyslipoproteinemia. *Med Clin North Am* 78:225–245, 1994
- Bakker-Arkema RG, Davidson MH, Goldstein RJ, Davignon J, Isaacsohn JL, Weiss SR, Keilson LM, Brown WV, Miller VT, Shurzinske LJ, Black DM: Efficacy and safety of a new HMG CoA reductase inhibitor, atorvastatin, in patients with hypertriglyceridemia. *JAMA* 276:128–133, 1996
- Kastelein JJ, Isaacsohn JL, Ose L, Hunninghake DB, Frohlich J, Davidson MH, Habib R, Dujovne CA, Crouse JR, Liu M, Melino MR, O'Grady L, Mercuri M, Mitchel YB: Comparison of effects of simvastatin versus atorvastatin on high-density lipoprotein cholesterol and apolipoprotein A-I levels. *Am J Cardiol* 86:221–223, 2000
- Freeman DJ, Norrie J, Sattar N, Neely RD, Cobbe SM, Ford I, Isles C, Lorimer AR, Macfarlane PW, McKillop JH, Packard CJ, Shepherd J, Gaw A: Pravastatin and the development of diabetes mellitus: evidence of a protective treatment effect in the West of Scotland Coronary Prevention Study. *Circulation* 103:357–362, 2001
- Economides P, Caselli A, Tiani E, Khadhiar L, Horton ES, Veves A: The effects of atorvastatin on endothelial function in diabetic patients and subjects at risk for type 2 diabetes. *J Clin Endocrinol Metab* 89:740–747, 2004
- Diabetes Prevention Program Research Group: Reduction in the incidence of type 2 diabetes with lifestyle intervention or metformin. *N Engl J Med* 346:393–403, 2002
- Chan JL, Heist K, DePaoli AM, Veldhuis JD, Mantzoros CS: The role of falling leptin in the neuroendocrine and metabolic adaptation to short-term starvation in healthy men. *J Clin Invest* 111:1409–1421, 2003
- Veves A, Saouaf R, Donaghue V, Mulloly C, Kistler J, Giurini JM, Horton ES, Fielding RA: Aerobic exercise capacity remains normal despite impaired endothelial function in the micro- and macrocirculation of physically active IDDM patients. *Diabetes* 46:1846–1852, 1997
- Corretti MC, Anderson TJ, Benjamin EJ, Celermajer D, Charbonneau F, Creager MA, Deanfield J, Drexler H, Gerhard-Herman M, Herrington D, Vallance P, Vita J, Vogel R: Guidelines for the ultrasound assessment of endothelial-dependent flow-mediated vasodilation of the brachial artery: a report of the International Brachial Artery Reactivity Task Force. *J Am Coll Cardiol* 39:257–265, 2002
- Kubota N, Terauchi Y, Yamauchi T, Kubota T, Moroi M, Matsui J, Eto K, Yamashita T, Kamon J, Satoh H, Yano W, Froguel P, Nagai R, Kimura S, Kadowaki T, Noda T: Disruption of adiponectin causes insulin resistance and neointimal formation. *J Biol Chem* 277:25863–25866, 2002
- Yamauchi T, Kamon J, Waki H, Terauchi Y, Kubota N, Hara K, Mori Y, Ide T, Murakami K, Tsuboyama-Kasaoka N, Ezaki O, Akanuma Y, Gavrilova O, Vinson C, Reitman ML, Kagechika H, Shudo K, Yoda M, Nakano Y, Tobe K, Nagai R, Kimura S, Tomita M, Froguel P, Kadowaki T

- owaki T: The fat-derived hormone adiponectin reverses insulin resistance associated with both lipoatrophy and obesity. *Nat Med* 7:941–946, 2001
26. Bluher M, Michael MD, Peroni OD, Ueki K, Carter N, Kahn BB, Kahn CR: Adipose tissue selective insulin receptor knockout protects against obesity and obesity-related glucose intolerance. *Dev Cell* 3:25–38, 2002
  27. Stefan N, Vojarova B, Funahashi T, Matsuzawa Y, Weyer C, Lindsay RS, Youngren JF, Havel PJ, Pratley RE, Bogardus C, Tataranni PA: Plasma adiponectin concentration is associated with skeletal muscle insulin receptor tyrosine phosphorylation, and low plasma concentration precedes a decrease in whole-body insulin sensitivity in humans. *Diabetes* 51: 1884–1888, 2002
  28. Lindsay RS, Funahashi T, Hanson RL, Matsuzawa Y, Tanaka S, Tataranni PA, Knowler WC, Krakoff J: Adiponectin and development of type 2 diabetes in the Pima Indian population. *Lancet* 360:57–58, 2002
  29. Yokota T, Oritani K, Takahashi I, Ishikawa J, Matsuyama A, Ouchi N, Kihara S, Funahashi T, Tenner AJ, Tomiyama Y, Matsuzawa Y: Adiponectin, a new member of the family of soluble defense collagens, negatively regulates the growth of myelomonocytic progenitors and the functions of macrophages. *Blood* 96:1723–1732, 2000
  30. Ouchi N, Kihara S, Arita Y, Maeda K, Kuriyama H, Okamoto Y, Hotta K, Nishida M, Takahashi M, Nakamura T, Yamashita S, Funahashi T, Matsuzawa Y: Novel modulator for endothelial adhesion molecules: adipocyte-derived plasma protein adiponectin. *Circulation* 100: 2473–2476, 1999
  31. Ouchi N, Kihara S, Arita Y, Nishida M, Matsuyama A, Okamoto Y: Adipocyte-derived plasma protein, adiponectin, suppresses lipid accumulation and class A scavenger receptor expression in human monocyte-derived macrophages. *Circulation* 103:1057–1063, 2001
  32. Weyer C, Funahashi T, Tanaka S, Hotta K, Matsuzawa Y, Pratley RE, Tataranni PA: Hypoadiponectinemia in obesity and type 2 diabetes: close association with insulin resistance and hyperinsulinemia. *J Clin Endocrinol Metab* 86:1930–1935, 2001
  33. Yu JG, Javorschi S, Hevener AL, Kruszynska YT, Norman RA, Sinha M, Olefsky JM: The effect of thiazolidinediones on plasma adiponectin levels in normal, obese, and type 2 diabetic subjects. *Diabetes* 51:2968–2974, 2002
  34. Satoh N, Ogawa Y, Usui T, Tagami T, Kono S, Uesugi H, Sugiyama H, Sugawara A, Yamada K, Shimatsu A, Kuzuya H, Nakao K: Antiatherogenic effect of pioglitazone in type 2 diabetic patients irrespective of the responsiveness to its antidiabetic effect. *Diabetes Care* 26: 2493–2499, 2003
  35. Okamoto Y, Kihara S, Ouchi N, Nishida M, Arita Y, Kumada M, Ohashi K, Sakai N, Shimomura I, Kobayashi H, Terasaka N, Inaba T, Funahashi T, Matsuzawa Y: Adiponectin reduces atherosclerosis in apolipoprotein E-deficient mice. *Circulation* 106:2767–2770, 2002
  36. Torzewski M, Rist C, Mortensen RF, Zwaka TP, Bienek M, Waltenberger J, Koenig W, Schmitz G, Hombach V, Torzewski J: C-reactive protein in the arterial intima: role of C-reactive protein receptor-dependent monocyte recruitment in atherogenesis. *Arterioscler Thromb Vasc Biol* 20:2094–2099, 2000
  37. Vaughan DE: PAI-1 and vascular disease in diabetes mellitus. In *Diabetes and Cardiovascular Disease*. Johnston MT, Veves A, Eds. Totowa, NJ, Humana Press, 2000, p. 237–247
  38. Devaraj S, Chan AV, Jialal I:  $\alpha$ -Tocopherol supplementation decreases plasminogen activator inhibitor-1 and P-selectin levels in type 2 diabetic patients. *Diabetes Care* 25:525–529, 2002
  39. Juhan VI, Alessi MC, Nalbonne G: Fibrinolysis and athero-thrombosis. *Curr Opin Lipidol* 4:477–483, 1993
  40. Vgontzas AN, Bixler EO, Papanicolaou DA, Chrousos GP: Chronic systemic inflammation in overweight and obese adults. *JAMA* 283:2235, 2000
  41. Gómez-Ambrosi J, Frühbeck G: Do resistin and resistin-like molecules also link obesity to inflammatory diseases? *Ann Intern Med* 135:306–307, 2001
  42. Tan KCB, Xu A, Chow WS, Lam MCW, Ai VH, Tam SCF, Lam KSL: Hypoadiponectinemia is associated with impaired endothelium-dependent vasodilation. *J Clin Endocrinol Metab* 89:765–769, 2004
  43. Fernandez-Real JM, Castro A, Vazquez G, Casamitjana R, Lopez-Bermejo A, Penarroja G, Ricart W: Adiponectin is associated with vascular function independent of insulin sensitivity. *Diabetes Care* 27: 739–745, 2004
  44. Maron DJ, Fazio S, Linton MF: Current perspectives on statins. *Circulation* 101: 207–213, 2000
  45. Endres M, Laufs U, Huang Z, Nakamura T, Huang P, Moskowitz MA, Liao JK: Stroke protection by 3-hydroxy-3-methylglutaryl (HMG)-CoA reductase inhibitors mediated by endothelial nitric oxide synthase. *Proc Natl Acad Sci U S A* 95: 8880–8885, 1998
  46. Sakai M, Kobori S, Matsumura T, Biwa T, Sato Y, Takemura T, Hakamata H, Horiuchi S, Shichiri M: HMG-CoA reductase inhibitors suppress macrophage growth induced by oxidized low density lipoprotein. *Atherosclerosis* 133:51–59, 1997
  47. Ridker PM, Rifai N, Pfeffer MA, Sacks F, Braunwald E: Long-term effects of pravastatin on plasma concentration of C-reactive protein: the Cholesterol and Recurrent Events (CARE) investigators. *Circulation* 100:230–235, 1999
  48. Hernandez-Perera O, Perez-Sala D, Navarro-Antolin J, Sanchez-Pascuala R, Hernandez G, Diaz C, Lamas S: Effects of the 3-hydroxy-3-methylglutaryl-CoA reductase inhibitors, atorvastatin and simvastatin, on the expression of endothelin-1 and endothelial nitric oxide synthase in vascular endothelial cells. *J Clin Invest* 101: 2711–2719, 1998
